# Supplementary material for: Sensitive and non-invasive cholesterol determination in saliva via optimization of enzyme loading and platinum nano-cluster composition
Source: Royal Society of Chemistry journal article supplement (doi:10.1039/c9an01679a), 2019-11-13
Supplement: c9an01679a1.pdf [file c9an01679a1.pdf]

## Supplementary Data

# Sensitive and Non-invasive Cholesterol Determination in Saliva via Optimization of Enzyme Loading and Platinum Nano-cluster Composition

Kyu Shik Eom<sup>1,2</sup>, Yi Jae Lee<sup>1</sup>, Seo Hye Won<sup>1</sup>, Ji Yoon Kang<sup>1</sup>, Joon Sub Shim<sup>2</sup> and Soo Hyun Lee<sup>1\*</sup>

<sup>1</sup> Center for BioMicroSystems, Korea Institute of Science and Technology, 02792, Seoul, Republic of Korea

<sup>2</sup>Department of Wireless Communications Engineering, Kwangwoon university, 01897, Seoul, Republic of Korea

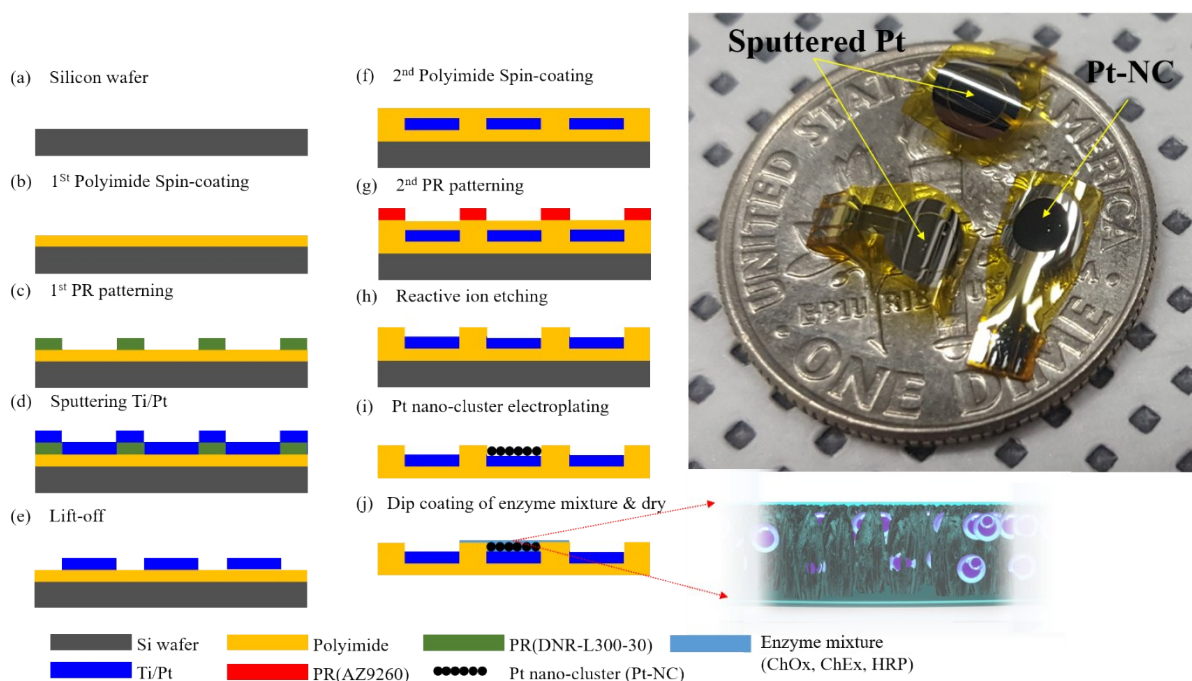

**Fig. S1.** Schematic illustration for the fabrication process of cholesterol sensor with Pt nano-cluster electrode (left) and photograph image of fabricated sensor (right).

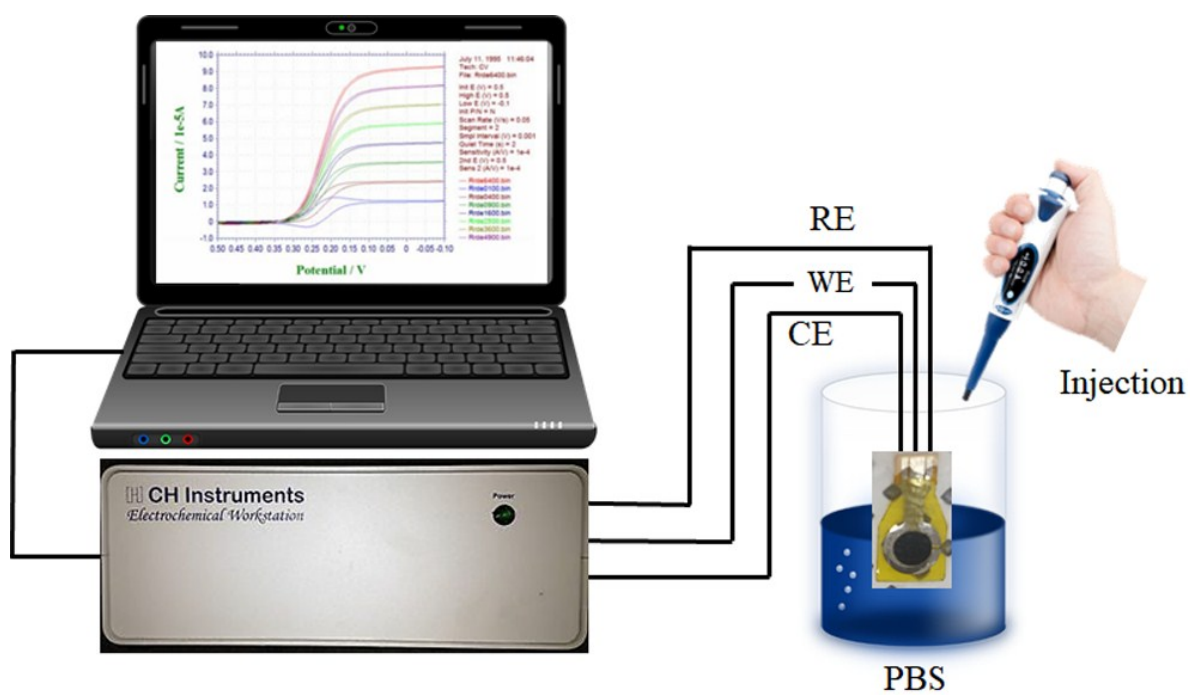

**Fig. S2.** Schematic drawing of the experimental setup.

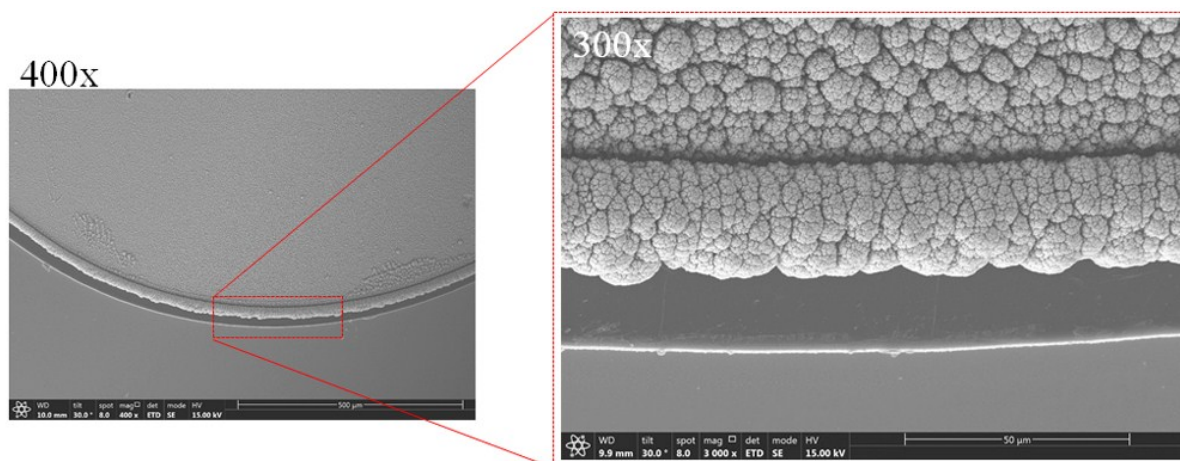

**Fig. S3.** SEM image between working electrode and counter electrode with electroplated 500 s.

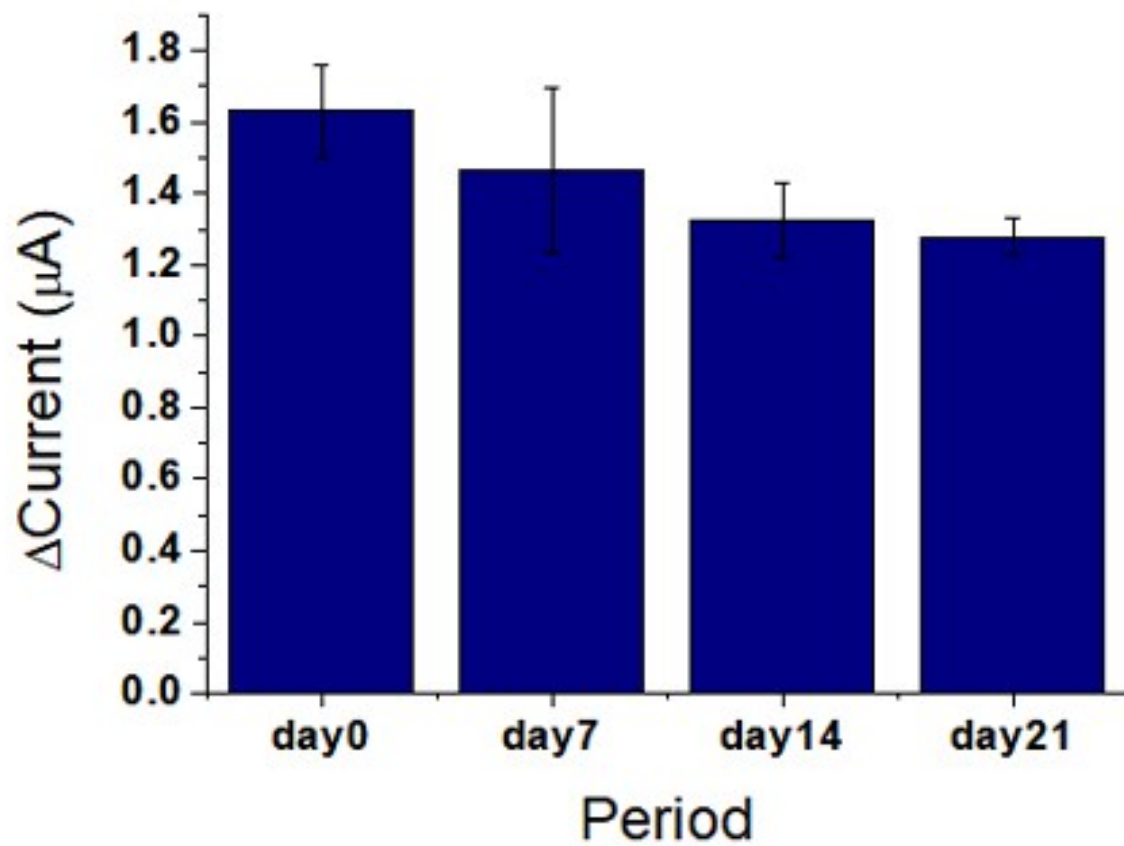

**Fig. S4.** Long-term stability test for sensor with Pt nano-cluster/enzyme/Nafion (n=3). The sensor was stored in 0.1 M PBS (pH 7.4) at 4 °C.
